# Supplementary material for: NCoR1 restrains thymic negative selection by repressing Bim expression to spare thymocytes undergoing positive selection
Source: Nat Commun. 2017 Oct 16;8:959. doi: 10.1038/s41467-017-00931-8 (PMC5643384; doi:10.1038/s41467-017-00931-8)
Supplement: Supplementary file 1 — Supplementary Information [file 41467_2017_931_MOESM1_ESM.pdf]

## Supplementary Figure 1

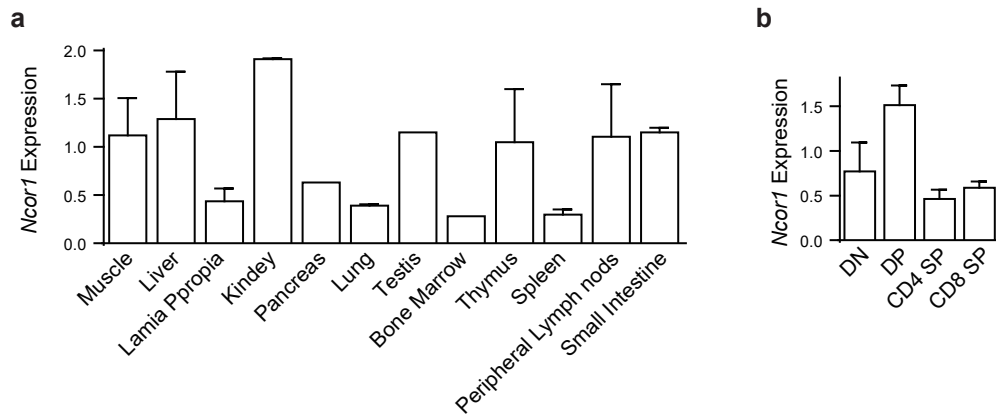

### Supplementary Figure 1. *Ncor1* expression profiles in different tissues and thymocyte subsets.

(a) Quantitative RT-PCR analysis of *Ncor1* mRNA expression in various tissues (n=3) and (b) in the indicated thymocyte subsets (n=3, repeat 2 times) sorted using flow cytometry. DN, CD4<sup>-</sup>CD8<sup>-</sup> double-negative thymocytes; DP, CD4<sup>+</sup>CD8<sup>+</sup> double-positive thymocytes; CD4 SP, CD4<sup>+</sup> single-positive thymocytes; CD8 SP, CD8<sup>+</sup> single-positive thymocytes.

## Supplementary Figure 2

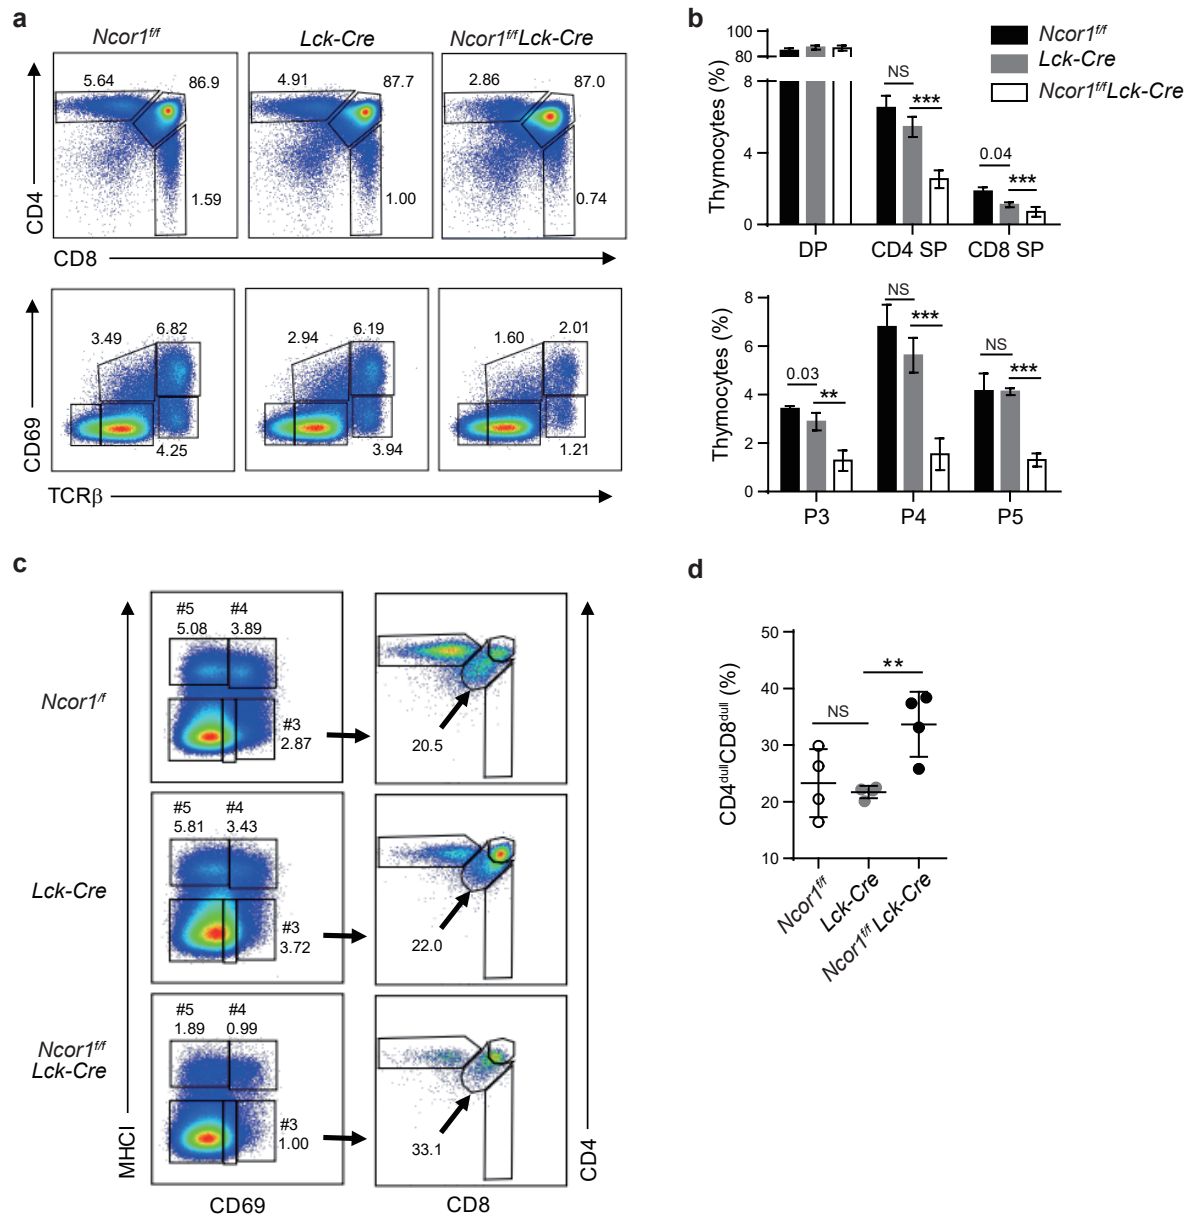

**Supplementary Figure 2. Thymocyte profiles in *Ncor1<sup>flx/flx</sup>*, *Lck-Cre* and *Ncor1<sup>flx/flx</sup>Lck-Cre* mice.** (a) Surface expression of CD4 versus CD8 (up) and CD69 versus TCR $\beta$  (down) on total thymocytes (n=4 for each group) detected by flow cytometry. (b) Quantification of different thymocyte subsets in (a). (c) Flow cytometry analysis of 5 sub-populations (left) by MHCI and CD69 expression on total thymocytes (n=4 for each group, respectively). The right panel shows CD4 and CD8 expression on gated population #3. (d) The proportion of CD4<sup>dull</sup>CD8<sup>dull</sup> subsets in population #3. Statistical significance was analysed using the two-tailed Student's t test (NS, not significant; \*\* P<0.01; \*\*\* P<0.001).

### Supplementary Figure 3

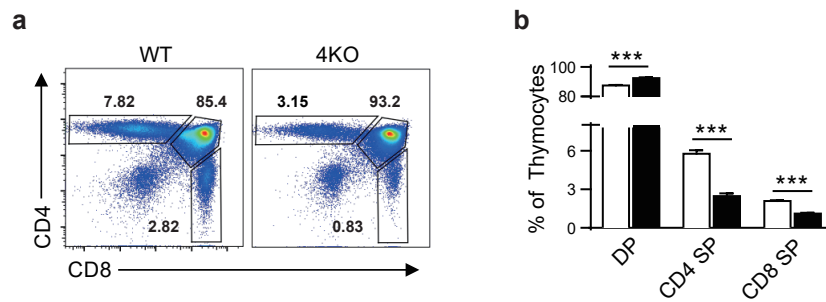

**Supplementary Figure 3. Thymocyte profiles in *Ncor1<sup>flox/flox</sup>CD4-Cre* mice.** (a) Surface expression of CD4 and CD8 on thymocytes from *Ncor1<sup>flox/flox</sup>CD4-Cre* (4KO) mice and *Ncor1<sup>flox/flox</sup>* (WT) mice (n=3 to 5). (b) Quantification of different thymocyte subsets in (a). DP, CD4<sup>+</sup>CD8<sup>+</sup> double-positive thymocytes; CD4 SP, CD4<sup>+</sup> single-positive thymocytes; CD8 SP, CD8<sup>+</sup> single-positive thymocytes. Data are representative of three independent experiments. Statistical significance was analysed using the two-tailed Student's t test (\*\*\*) P<0.001).

## Supplementary Figure 4

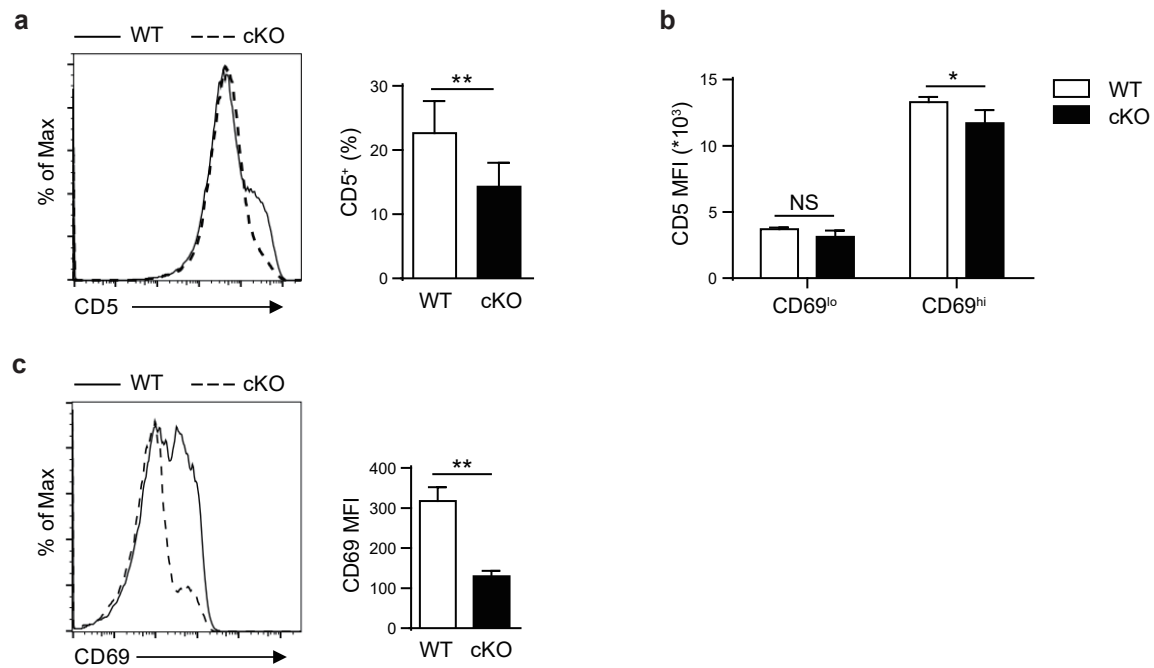

**Supplementary Figure 4. CD5 and CD69 expression in NCoR1-deficient thymocytes.** (a) Flow cytometry analysis of CD5 expression (left) on total thymocytes from NCoR1-deficient (cKO) and wild type (WT) mice (n=3 to 5) and quantification of the CD5-positive sub-population (right). (b) Mean fluorescence intensity of CD5 on CD69<sup>lo</sup> and CD69<sup>hi</sup> DP (CD4<sup>+</sup>CD8<sup>+</sup> double-positive) thymocytes from cKO (n=4) and WT (n=4) mice. (c) The histogram plot (left) and the mean fluorescence intensity (right) of CD69 expression on total thymocytes from cKO and WT OT-II TCR-transgenic mice (n=3) detected by flow cytometry. Data are representative of two independent experiments. Statistical significance was analysed using the two-tailed Student's t test (NS, not significant, \*\* P<0.01).

## Supplementary Figure 5

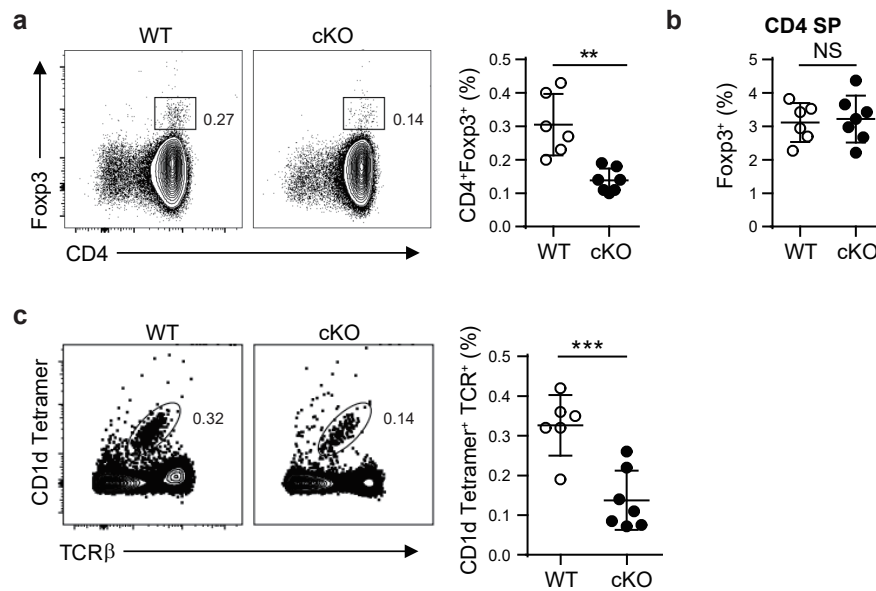

**Supplementary Figure 5. Development of both Treg cells and iNKT cells is defective in the thymus of NCoR1-deficient mice.** (a) Fxp3 expression in total thymocytes from NCoR1-deficient (cKO) (n=7) and wild type (WT) (n=6) mice by intracellular staining (left) and quantification of Fxp3<sup>+</sup> cells (right). (b) Quantification of Fxp3<sup>+</sup> cells in CD4<sup>+</sup> single-positive (CD4 SP) WT and cKO thymocytes in (a). (c) CD1d Tetramer and TCRβ expression in total thymocytes from WT (n=6) or cKO (n=7) mice (left) by flow cytometry and quantification of CD1d Tetramer<sup>+</sup>TCRβ<sup>+</sup> cells (right). Statistical significance was analysed using the two-tailed Student's t test (NS, not significant; \*\* P<0.01; \*\*\* P<0.001).

## Supplementary Figure 6

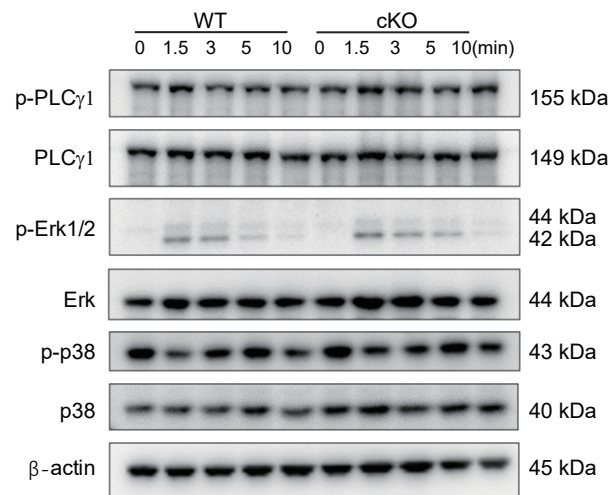

**Supplementary Figure 6. TCR signaling in NCoR1-deficient thymocytes.** Immunoblot analysis of phosphorylated (p)-PLC- $\gamma$ 1, p-Erk1/2, p-p38 and total protein of PLC- $\gamma$ 1, Erk and p38 in lysates from wild type (WT) and NCoR1-deficient (cKO) thymocytes without or with stimulation *in vitro* for the indicated amounts of time.  $\beta$ -actin served as a loading control. Data are representative of three independent experiments.

## Supplementary Figure 7

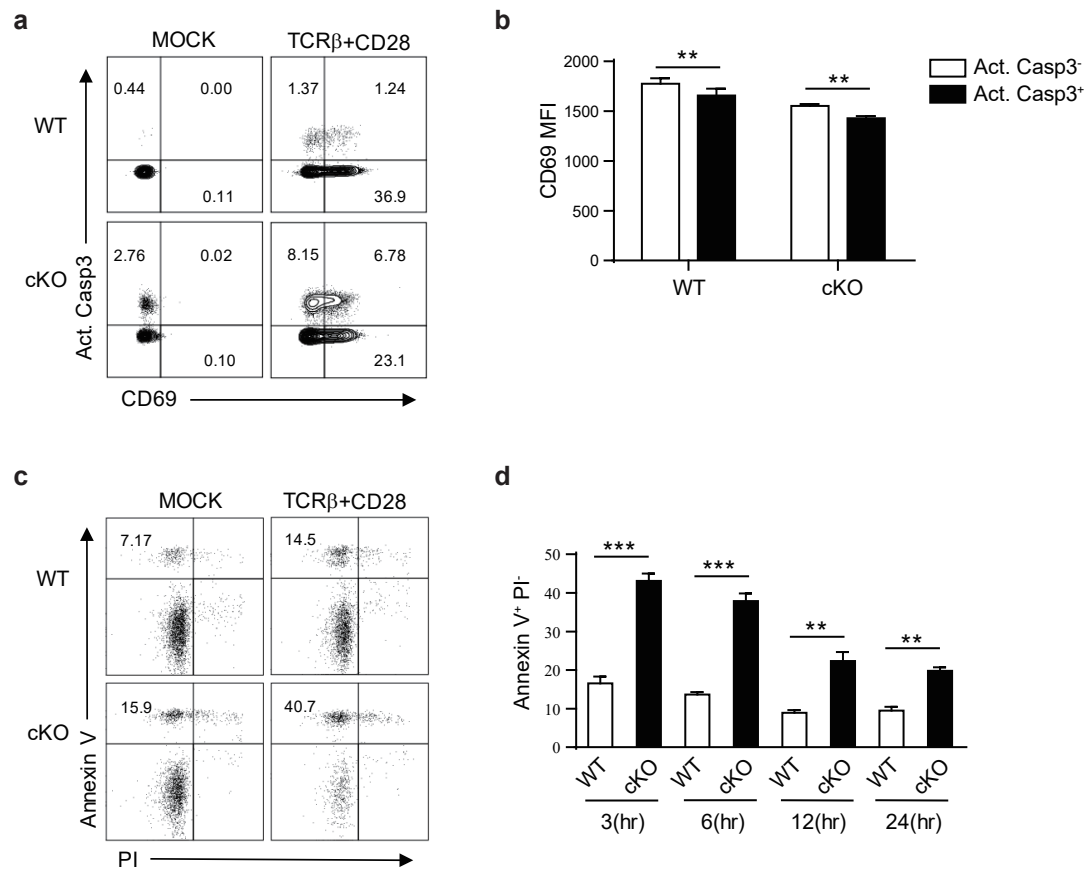

**Supplementary Figure 7. NCoR1-deficient thymocytes are prone to apoptosis.** (a) The surface marker CD69 and intracellular staining of the active caspase-3 (Act.Casp.3) detected by flow cytometry in total NCoR1-deficient (cKO) (n=3) and wild type (WT) (n=3) thymocytes stimulated or not with TCR  $\beta$  and CD28 for 6 hr. (b) The mean fluorescence intensity of CD69 expression in Act.Casp3<sup>+</sup> and Act.Casp3<sup>-</sup> thymocytes in (a). (c) Flow cytometric staining of Annexin V and propidium iodide (PI) on WT and cKO thymocytes stimulated *in vitro* for 6 hr (n=3 to 5). (d) Quantification of the apoptotic thymocytes shown in (c). Data are representative of two independent experiments. Statistical significance was analysed using the two-tailed Student's t test (\*\* P<0.01; \*\*\* P<0.001).

## Supplementary Figure 8

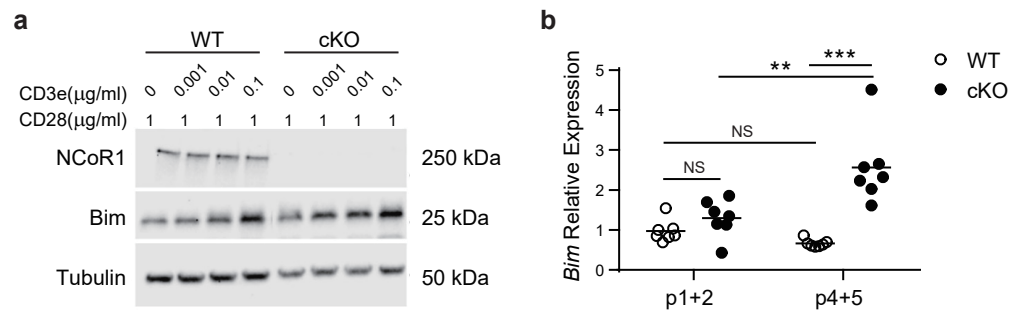

**Supplementary Figure 8. Bim expression in TCR signalling stimulated thymocytes *in vitro* and in sorted non-activated and activated thymocytes *in vivo*.** (a) Bim protein levels in NCoR1-deficient (cKO) and wild type (WT) thymocytes stimulated with different concentrations of anti-TCRβ. (b) Non-activated thymocytes (population 1 + 2, p1+2) and activated thymocytes (population 4 + 5, p4+5) were sorted by the surface expression of CD69 and TCRβ on total WT (n=7) and cKO (n=7) thymocytes according to the gating in Fig. 2a. *Bim* mRNA levels in these sorted thymocytes were analysed by quantitative RT-PCR. Statistical significance was analysed using the two-tailed Student's t test (NS, not significant, \*\* P<0.01; \*\*\* P<0.001).

## Supplementary Figure 9

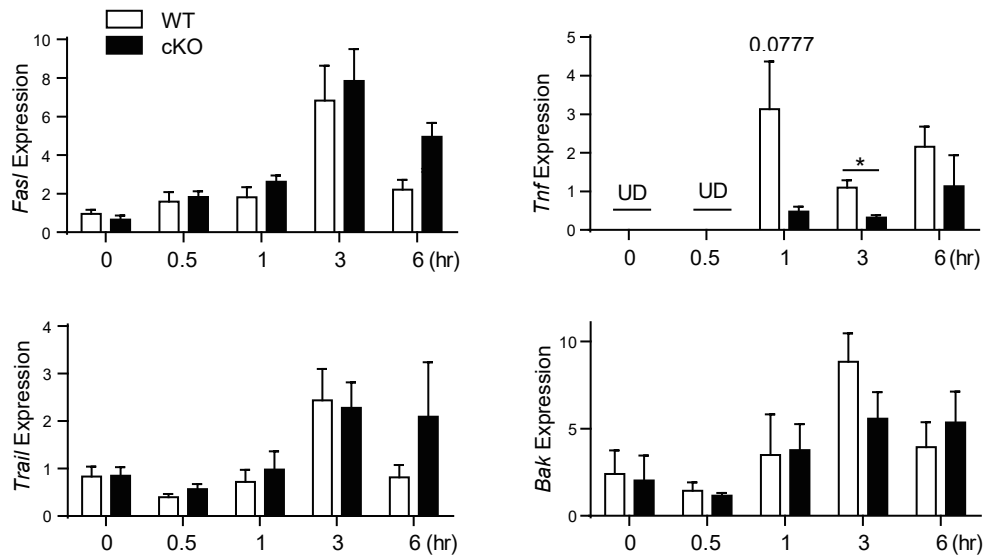

**Supplementary Figure 9. Expression of proapoptotic genes in enriched DP thymocytes.** Quantitative RT-PCR analysis of *Fas*, *Tnf*, *Trail*, and *Bak* mRNA levels in enriched NCoR1-deficient (cKO) and wild type (WT) DP (CD4<sup>+</sup>CD8<sup>+</sup> double-positive) thymocytes activated *in vitro* for the indicated time points. Data are representative of two independent experiments with four mice per genotype. The number indicates the p value. Statistical significance was analysed using the two-tailed Student's t test

## Supplementary Figure 10

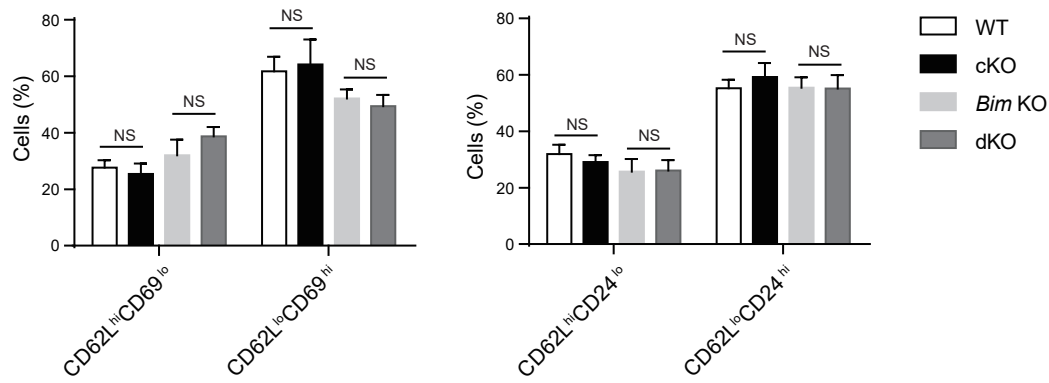

**Supplementary Figure 10. Proportions of mature (CD62L<sup>hi</sup>CD69<sup>lo</sup> or CD62L<sup>hi</sup>CD24<sup>lo</sup>) and immature (CD62L<sup>lo</sup>CD69<sup>hi</sup> or CD62L<sup>lo</sup>CD24<sup>hi</sup>) subsets in WT (n=4), cKO (n=4), *Bim* KO (n=4) and dKO (n=5) thymocytes.** Flow cytometry analysis and gating of mature or immature subsets were performed as shown in Fig. 6c. WT, wild type; cKO, NCoR1-deficient; dKO, *Ncor1* and *Bim* double knockout. Statistical significance was analysed using the two-tailed Student's t test (NS, not significant).

## Supplementary Figure 11

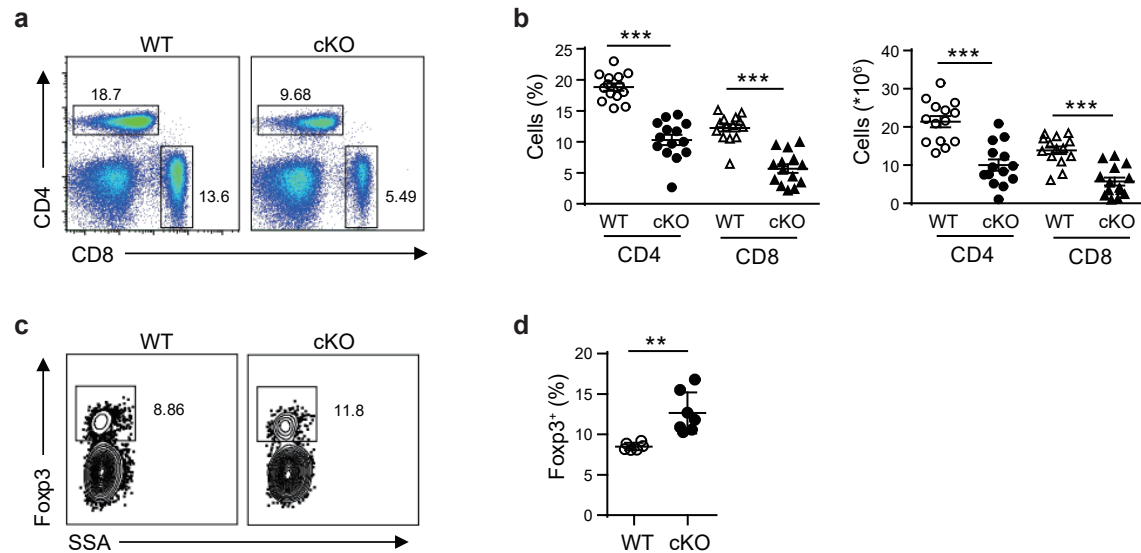

**Supplementary Figure 11. Loss of NCoR1 reduces peripheral CD4 and CD8 T cells in the spleen but increases the proportion of Tregs.** (a) The surface expression of CD4 and CD8 on NCoR1-deficient (cKO) (n=4) and wild type (WT) (n=4) splenocytes detected by flow cytometry. (b) The percentages (left) or numbers (right) of CD4 and CD8 T cells gated in (a). Data were generated from three independent experiments. (c) Intracellular expression of Foxp3 in CD4<sup>+</sup> TCR $\beta$ <sup>+</sup> cKO (n=6) and WT (n=6) splenocytes detected by flow cytometry. (d) Quantification of the Foxp3<sup>+</sup>CD4<sup>+</sup> T cells in (c). Data are representative of three independent experiments with more than three mice per group. Statistical significance was analysed using the two-tailed Student's t test (\*\* P<0.01; \*\*\* P<0.001).

## Supplementary Figure 12

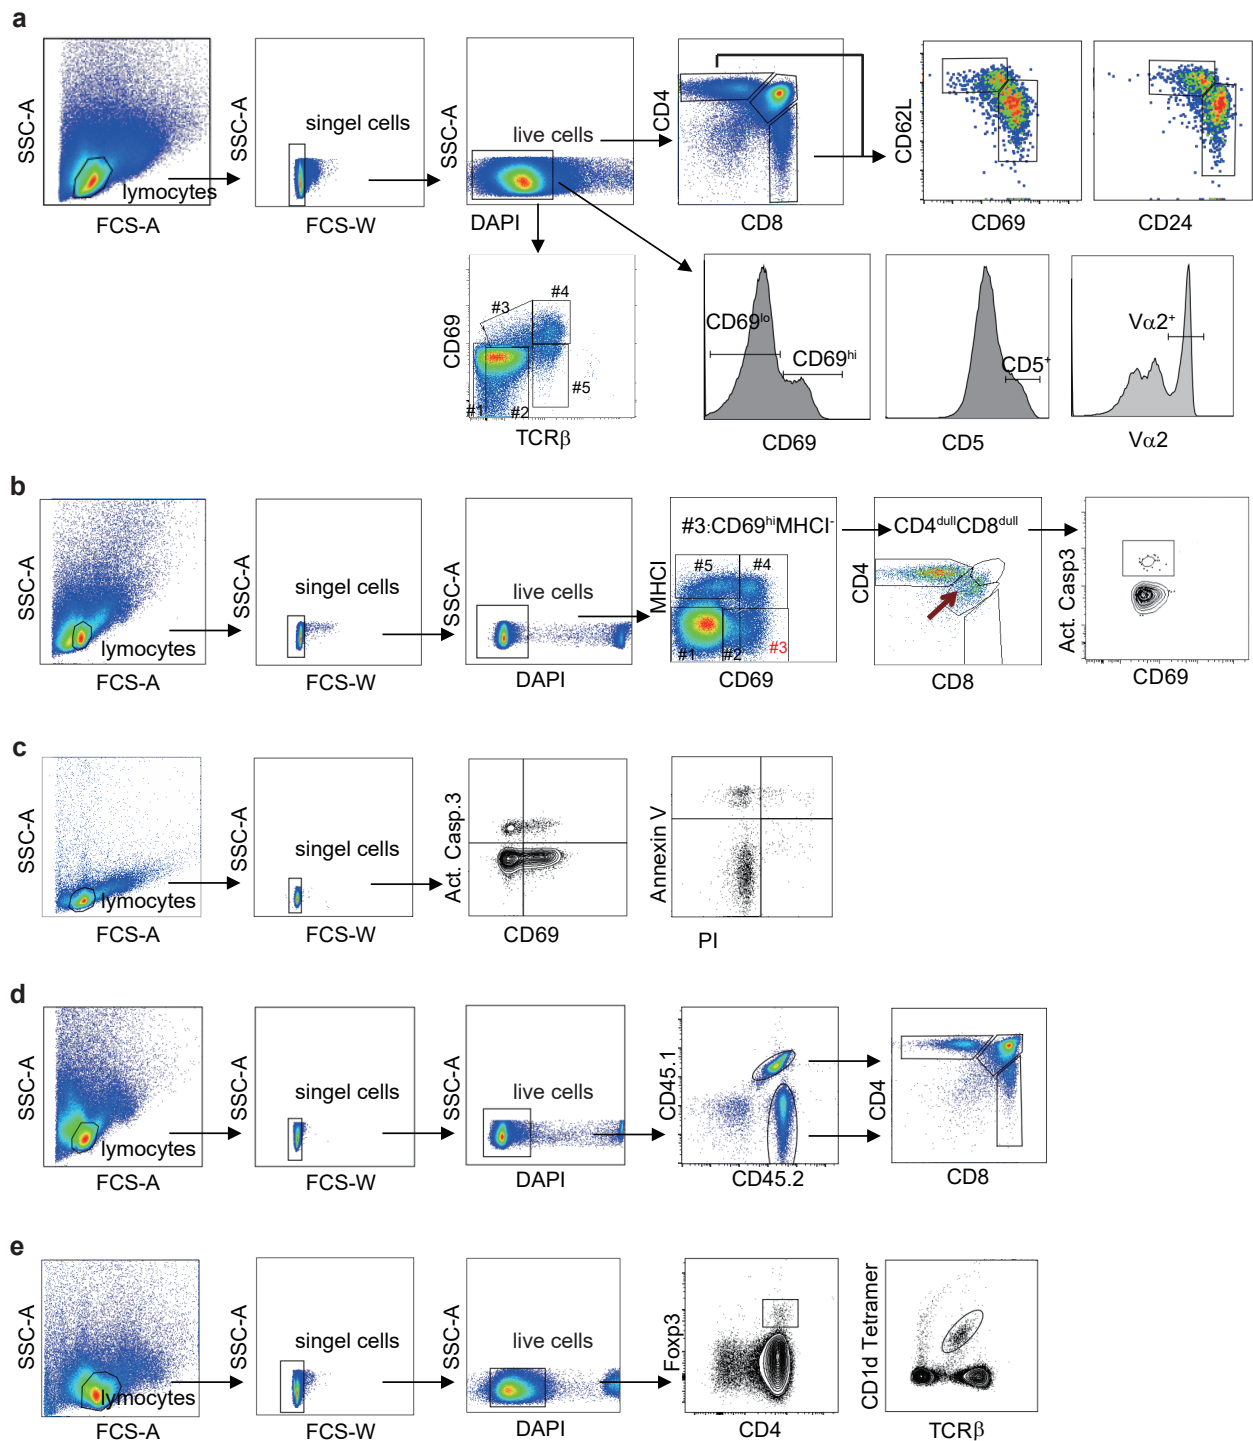

**Supplementary Figure 12. Gating strategies for flow cytometry analyses.** Representative FACS plots showing: (a) Gating strategy for CD4, CD8, CD69, TCRβ, CD5, and Vα2 (for OTII background) expression. (b) Gating strategy for intracellular Act.Casp.3 in CD69<sup>hi</sup>MHCII<sup>-</sup>CD4<sup>dull</sup>CD8<sup>dull</sup> thymocytes. (c) Gating strategy to detect apoptosis of thymocytes stimulated *in vitro*. (d) Gating strategy to analyze thymocytes profiling in bone marrow chimeras. (e) Gating strategy to analyze T regulatory cells and invariant natural killer T cells in thymus.

## Supplementary Figure 13

**Fig. 5d**

anti-NCOR1

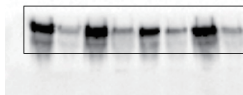

anti-Bim

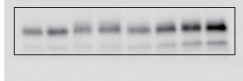

anti-tubulin

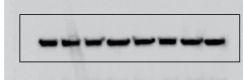

**Suppl. Fig. 6**

anti-p-PLC $\gamma$ 1

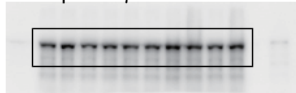

anti-PLC $\gamma$ 1

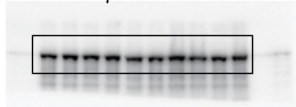

anti-p-Erk1/2

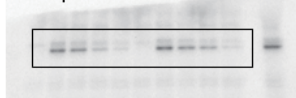

anti-Erk

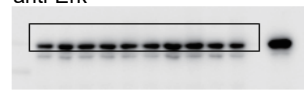

anti-p-p38

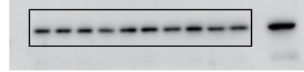

anti-p38

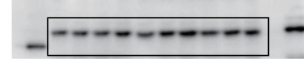

anti- $\beta$ -actin

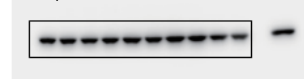

**Suppl. Fig. 8a**

anti-NCOR1

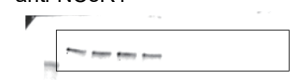

anti-Bim

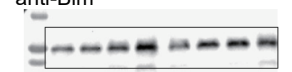

anti-tubulin

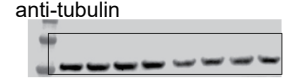

**Supplementary Figure 13. The uncropped scans of western blots from Figure 5, Supplementary Figure 6 and 8a.**

**Supplemental Table 1. Genes expressed differentially in thymocytes by RNA-seq**

**In steady state thymocytes**

| Gene              | cKO/WT (ex vivo)  |
|-------------------|-------------------|
|                   | log2(fold_change) |
| <i>Gm7125</i>     | infinite          |
| <i>Gm6594</i>     | infinite          |
| <i>AC163653.5</i> | infinite          |
| <i>Gh</i>         | infinite          |
| <i>AC158672.3</i> | infinite          |
| <i>Sfn</i>        | 1.41297           |
| <i>Spsb1</i>      | 1.2823            |
| <i>St3gal6</i>    | 1.25667           |
| <i>Wnt8b</i>      | 1.24523           |
| <i>Gm8186</i>     | 1.10604           |
| <i>Dusp4</i>      | 1.08605           |
| <i>Ifngr1</i>     | 1.05791           |
| <i>Tbl1xr1</i>    | 0.954922          |
| <i>Cdk5r1</i>     | 0.926474          |
| <i>Bcl6</i>       | 0.918982          |
| <i>Mbnl1</i>      | 0.853401          |
| <i>Dusp5</i>      | 0.831608          |
| <i>Slc9a9</i>     | 0.798935          |
| <i>Scd2</i>       | 0.785073          |
| <i>Cd74</i>       | 0.72575           |
| <i>Pik3r1</i>     | 0.725251          |
| <i>Pik3cg</i>     | 0.720207          |
| <i>Gimap6</i>     | 0.692412          |
| <i>Ctsl</i>       | 0.683771          |
| <i>Lig4</i>       | 0.680034          |
| <i>Tespa1</i>     | 0.670143          |
| <i>Tubb2b</i>     | 0.627266          |
| <i>Abcg1</i>      | 0.595489          |
| <i>Esyt1</i>      | -0.632325         |
| <i>Ltb</i>        | -0.645846         |
| <i>Gpr56</i>      | -0.670893         |
| <i>Rpl23a</i>     | -0.674669         |
| <i>Nrp1</i>       | -0.728366         |
| <i>Ntn1</i>       | -0.742279         |
| <i>Smoc1</i>      | -0.791651         |

| Gene              | cKO/WT (ex vivo)  |
|-------------------|-------------------|
|                   | log2(fold_change) |
| <i>Adcy7</i>      | -0.801285         |
| <i>Itgb7</i>      | -0.82898          |
| <i>Cxxc5</i>      | -0.833748         |
| <i>Als2cl</i>     | -0.847795         |
| <i>Mllt6</i>      | -0.866141         |
| <i>Cnn2</i>       | -0.918308         |
| <i>Pdcd1</i>      | -0.949894         |
| <i>Cd53</i>       | -0.964088         |
| <i>St3gal1</i>    | -1.00801          |
| <i>Slc6a19</i>    | -1.0084           |
| <i>Shisa5</i>     | -1.01297          |
| <i>Sema7a</i>     | -1.0856           |
| <i>AB124611</i>   | -1.08824          |
| <i>H2-K1</i>      | -1.10853          |
| <i>Fgf13</i>      | -1.16045          |
| <i>Padi4</i>      | -1.1741           |
| <i>AC165246.1</i> | -1.21028          |
| <i>Ccr7</i>       | -1.26486          |
| <i>Slfn1</i>      | -1.30495          |
| <i>H2-Q7</i>      | -1.31484          |
| <i>Ephx1</i>      | -1.32313          |
| <i>Ctsw</i>       | -1.32528          |
| <i>Nkg7</i>       | -1.32796          |
| <i>Xrra1</i>      | -1.36339          |
| <i>Jup</i>        | -1.40723          |
| <i>Phlda1</i>     | -1.42058          |
| <i>Paqr7</i>      | -1.57394          |
| <i>Ccnd2</i>      | -1.59108          |
| <i>Lfng</i>       | -1.67108          |
| <i>Cd7</i>        | -1.67425          |
| <i>Gm10499</i>    | -1.73999          |
| <i>Sdc4</i>       | -1.93547          |
| <i>n-R5-8s1</i>   | -2.25768          |
| <i>Cd200</i>      | -3.59722          |
| <i>Gm11223</i>    | -4.56491          |

### In activated thymocytes

| Gene              | KO/WT (3h activation) |
|-------------------|-----------------------|
|                   | log2(fold_change)     |
| <i>Gm7125</i>     | infinite              |
| <i>Gm6594</i>     | infinite              |
| <i>Ighv1-49</i>   | infinite              |
| <i>AC160982.1</i> | 2.03594               |
| <i>Sfn</i>        | 1.3304                |
| <i>Acox1</i>      | 1.14459               |
| <i>Tbl1xr1</i>    | 1.06335               |
| <i>Scd2</i>       | 1.06322               |
| <i>Il12rb1</i>    | 0.956431              |
| <i>Dusp4</i>      | 0.913305              |
| <i>ERDR1</i>      | 0.896455              |
| <i>Gimap9</i>     | 0.89101               |
| <i>Bcl6</i>       | 0.852289              |
| <i>Abcg1</i>      | 0.841595              |
| <i>Ptger4</i>     | 0.739682              |
| <i>Ldlr</i>       | 0.732622              |
| <i>Gimap8</i>     | 0.719569              |
| <i>Gramd3</i>     | 0.707089              |
| <i>Bcl2l11</i>    | 0.673482              |
| <i>Mr1</i>        | 0.651132              |
| <i>Mbnl1</i>      | 0.638582              |
| <i>Ccnd3</i>      | 0.630751              |
| <i>Ctsl</i>       | 0.612296              |
| <i>Ccr4</i>       | 0.592412              |
| <i>Irf4</i>       | -0.655463             |
| <i>Cd53</i>       | -0.671309             |
| <i>Ntn1</i>       | -0.739517             |
| <i>Icos</i>       | -0.75102              |
| <i>Gpr56</i>      | -0.800305             |

| Gene            | KO/WT (3h activation) |
|-----------------|-----------------------|
|                 | log2(fold_change)     |
| <i>B4galnt1</i> | -0.800943             |
| <i>Myc</i>      | -0.803976             |
| <i>Gm14085</i>  | -0.814945             |
| <i>Slc6a19</i>  | -0.820457             |
| <i>Ccr7</i>     | -0.823115             |
| <i>H2-K1</i>    | -0.839568             |
| <i>Fam134b</i>  | -0.856552             |
| <i>Adora2a</i>  | -0.886581             |
| <i>Tnf</i>      | -0.955403             |
| <i>Cxxc5</i>    | -0.955899             |
| <i>Evl</i>      | -1.04317              |
| <i>Pdcd1</i>    | -1.07871              |
| <i>H2-Q7</i>    | -1.11737              |
| <i>Cd83</i>     | -1.25182              |
| <i>Ifi27l2a</i> | -1.3544               |
| <i>Cited4</i>   | -1.38267              |
| <i>Lad1</i>     | -1.43564              |
| <i>Tagap</i>    | -1.43739              |
| <i>Egr3</i>     | -1.63327              |
| <i>Xcl1</i>     | -1.71541              |
| <i>Lfng</i>     | -1.89111              |
| <i>Tnfrsf9</i>  | -2.02836              |
| <i>Rgs16</i>    | -2.09375              |
| <i>Ccnd2</i>    | -2.23925              |
| <i>n-R5-8s1</i> | -2.32324              |
| <i>Sh3gl3</i>   | -2.4747               |
| <i>Apbb2</i>    | -3.47654              |
| <i>Gm11223</i>  | -3.80225              |

**Supplemental Table 2. Antibodies Information****Antibodies for Flow cytometry analysis**

| Antibody     | Clone        | Dilution | Company       |
|--------------|--------------|----------|---------------|
| CD4          | GK15         | 1:200    | eBioscience   |
| CD8 $\alpha$ | 53-6.7       | 1:200    | eBioscience   |
| CD69         | H1.2F3       | 1:200    | eBioscience   |
| TCR $\beta$  | H57-597      | 1:200    | eBioscience   |
| MHCI         | AF6-88.5.5.3 | 1:200    | eBioscience   |
| CD5          | 53-7.3       | 1:200    | eBioscience   |
| CD24         | M1/69        | 1:200    | eBioscience   |
| CD62L        | MEL-14       | 1:200    | eBioscience   |
| CD45.1       | A20          | 1:200    | BD Bioscience |
| CD45.2       | 104          | 1:200    | BD Bioscience |
| Foxp3        | FJK-16s      | 1:200    | eBioscience   |
| V $\alpha$ 2 | 20.1         | 1:200    | eBioscience   |

**Antibodies for Immunoblot analysis**

| Antibody                     | Code        | Dilution | Company                   |
|------------------------------|-------------|----------|---------------------------|
| anti-rabbit-NCoR1            | 5948S       | 1:1000   | Cell Signaling Technology |
| anti-rabbit-Bim              | 2933S       | 1:1000   | Cell Signaling Technology |
| anti-rabbit-p-PLC $\gamma$ 1 | 2821S       | 1:1000   | Cell Signaling Technology |
| anti-mouse-PLC $\gamma$ 1    | ab76155     | 1:1000   | Abcam                     |
| anti-mouse-p-Erk1/2          | sc-7383     | 1:500    | Santa Cruz Biotechnology  |
| anti-rabbit-Erk              | sc-93       | 1:2000   | Santa Cruz Biotechnology  |
| anti-rabbit-p-p38            | 9211S       | 1:1000   | Cell Signaling Technology |
| anti-rabbit-p38              | sc-728      | 1:2000   | Santa Cruz Biotechnology  |
| anti-rabbit- $\beta$ -actin  | 4970S       | 1:2000   | Cell Signaling Technology |
| anti-rabbit-tublin           | CP06        | 1:2000   | EMD Millipore             |
| Goat anti-rabbit-IgG(H+L)    | 111-035-003 | 1:3000   | Jackson Immuno&Research   |
| Donkey anti-mouse-IgG(H+L)   | 715-035-150 | 1:3000   | Jackson Immuno&Research   |

**Antibodies for CHIP analysis**

| Antibody     | Code   | Dilution   | Company                   |
|--------------|--------|------------|---------------------------|
| anti-NCoR1   | 5948S  | 1 g per IP | Cell Signaling Technology |
| anti-H3ac    | 06-599 | 1 g per IP | Millipore                 |
| anti-H4ac    | 06-598 | 1 g per IP | Millipore                 |
| anti-H3K27ac | ab4729 | 1 g per IP | Abcam                     |
| anti-H3K4me1 | ab8580 | 1 g per IP | Abcam                     |
| anti-H3K4me3 | ab6002 | 1 g per IP | Abcam                     |
| IgG          | 3900S  | 1 g per IP | Cell Signaling Technology |

**Supplemental Table 3. Primer for Quantitative RT-PCR analysis**

|              |         |                                  |
|--------------|---------|----------------------------------|
| <i>Ncor1</i> | Forward | 5'-TGCGTCAGCTTTCTGTGA TTCCACC-3' |
|              | Reverse | 5'-TGA TTTCTGCCTCTGCGTTTTTCCA-3' |
| <i>Bim</i>   | Forward | 5'-CGACAGTCTCAGGAGGAACC-3'       |
|              | Reverse | 5'-CCTTCTCCATACCAGACGGA-3'       |
| <i>FasI</i>  | Forward | 5'-TGAATTACCCATGTCCCCAG-3'       |
|              | Reverse | 5'-AAACTGACCCTGGAGGAGCC-3'       |
| <i>Tnf</i>   | Forward | 5'-CATCTTCTCAAAATTCGAGTGACAA-3'  |
|              | Reverse | 5'-TGGGAGTAGACAAGGTACAACCC-3'    |
| <i>Trail</i> | Forward | 5'-ATGATGGTGATTTGCATAGTGCT-3'    |
|              | Reverse | 5'-AGCTGCTTCATCTCGTTGGTG-3'      |
| <i>Bak</i>   | Forward | 5'-AATGGCATCCGGACAAGGAC-3'       |
|              | Reverse | 5'-TGTTCTGCTGGTGGAGGTA-3'        |
| <i>Actb</i>  | Forward | 5'-GGCTGTATTCCCCTCCATCG-3'       |
|              | Reverse | 5'-CCAGTTGGTAACAATGCCATGT-3'     |
